# Supplementary material
Source: Research Square preprint supplement (doi:10.21203/rs.3.rs-9038386/v1)
Supplement: Supplementary file 1 [file 292d3aead58bbe88d7c2cc54.docx]

**Supplementary Information**

**A Self-Powered Ultrafast Polarization-Sensitive Multifunctional Photodetector Driven by Phonon Anisotropy in a PtSe₂/MoSe₂ Heterostructure**

Priya Rani1,2, Rohit Dahiya1, Chaitanya B Auti2, Pradeep Kumar2* and Mukesh Kumar1*

1Functional and Renewable Energy Materials Laboratory, Department of Physics, Indian Institute of Technology Ropar, Rupnagar, Punjab – 140001, India

2School of Physical Sciences, Indian Institute of Technology Mandi, Mandi-175005, India.

*Corresponding email – [mkumar@iitrpr.ac.in](mailto:mkumar@iitrpr.ac.in) , [pkumar@iitmandi.ac.in](mailto:pkumar@iitmandi.ac.in)


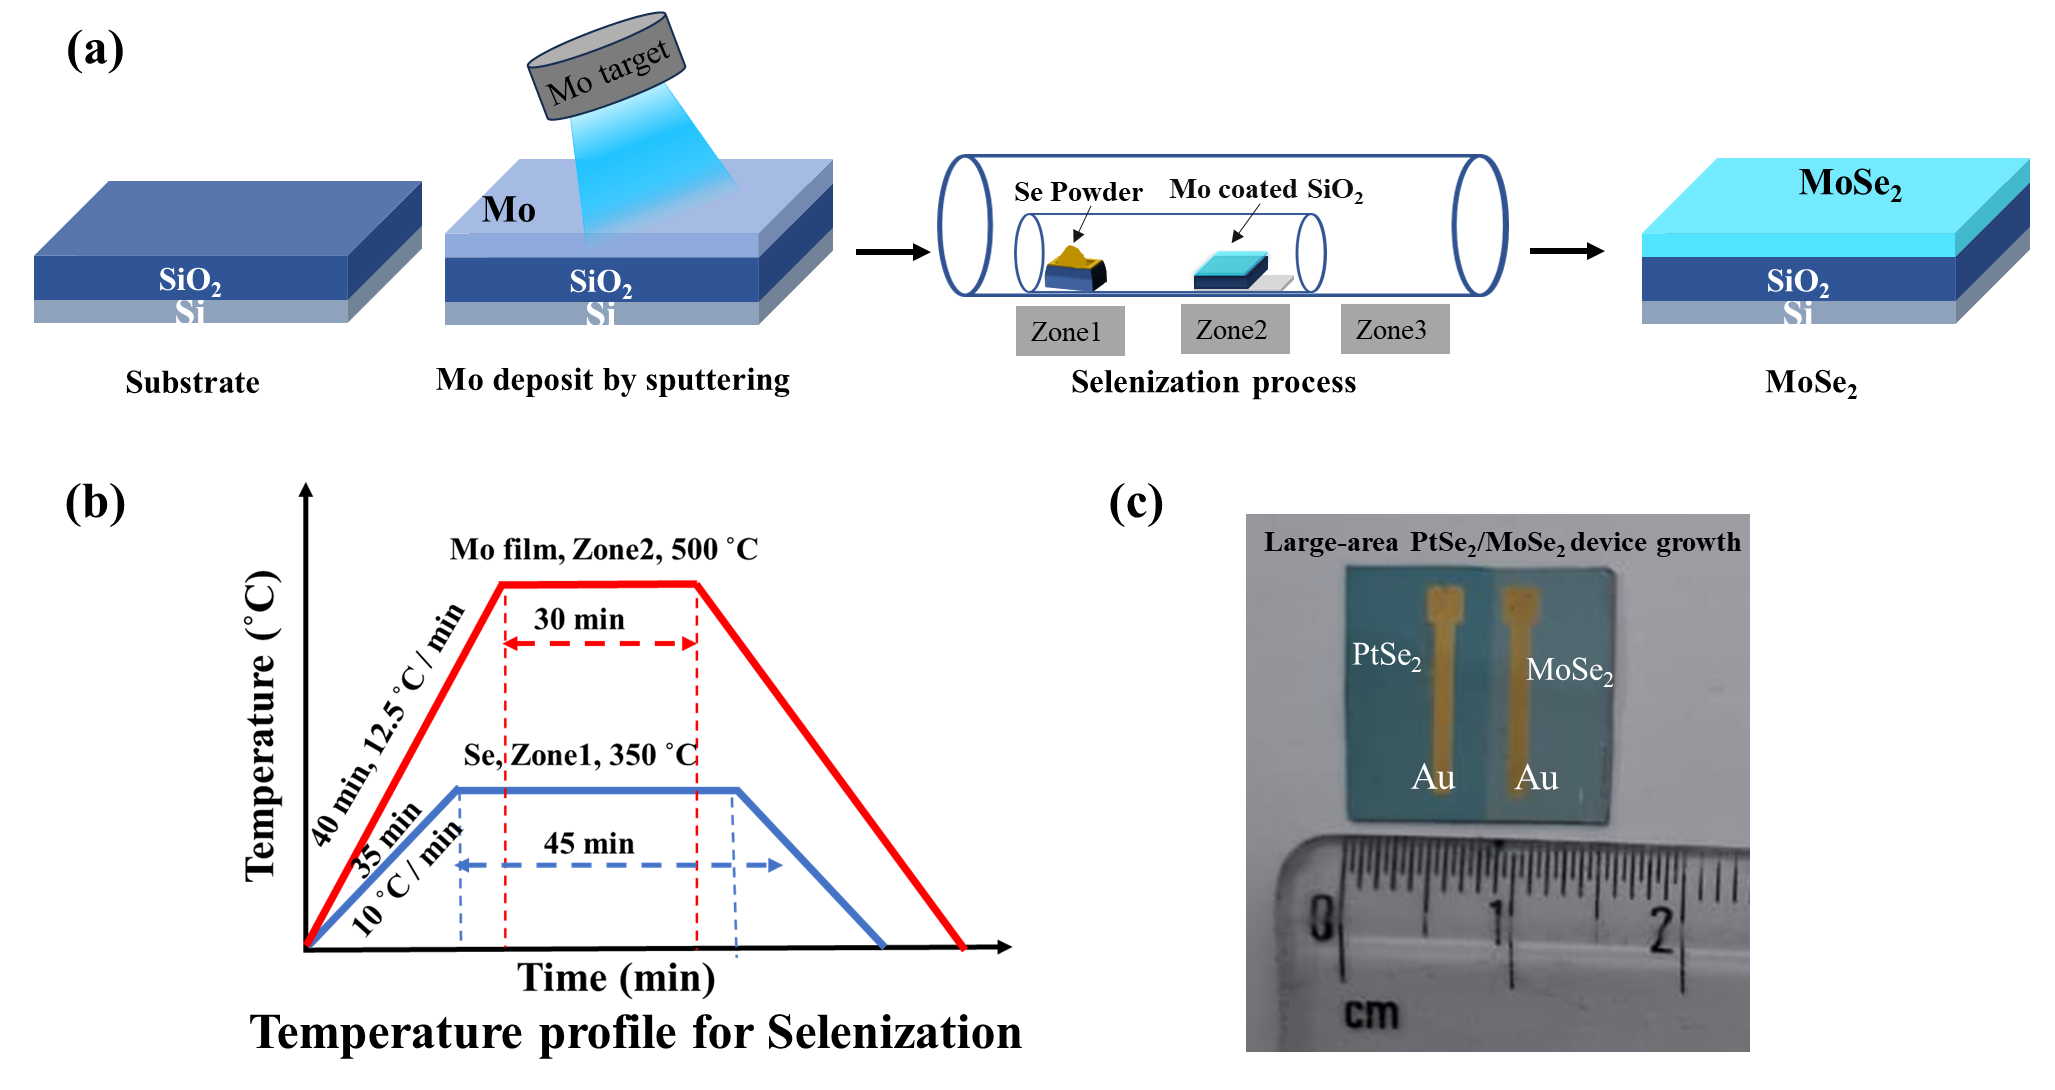


**Figure S1**: Growth of MoSe2 thin film by the TAC method. **(a)** The schematic of the growth of the MoSe2 film on the SiO2/Si substrate (sputtering + CVD). **(b)** Temperature profile for CVD during selenization of Mo-coated thin film. **(c)** Large area (1.5x1.5 cm2) growth of PtSe2/MoSe2 device.

**Note-S1. Polarization-dependent Raman measurements**

Polarization-dependent Raman measurements of PtSe2 and PtSe2/MoSe2 heterostructure were carried out by rotating the polarization of the incident light with a half-wave plate (λ/2 plate) in 10˚ increments, over a range of 0˚ to 360˚, while the scattered light polarization was kept fixed using an analyzer. The Raman active modes A1g (~207.6 cm-1) and Eg (~176.4 cm-1) of PtSe2 and modes of PtSe2/MoSe2 at E1g (~169 cm-1), E1g (~176.4 cm-1), A1g (~207 cm-1), and A1g (~239 cm-1) show a periodic variation of intensities with the rotation of incident light polarization. The angular variation of the Raman intensity can be described within a semi-classical framework. The Raman scattering intensity (I) is expressed as:

**(1)**

where T denotes the transpose of the vector, and R represents the Raman tensor 1. and representing the unit polarization vectors of the incident and scattered light, respectively. For this configuration, the polarization unit vectors of the incident and scattered light are given as and, where represents the relative angle between and , whereas defines the arbitrary angle of scattered light from the X-axis when polarization unit vectors are projected in the XY-plane (ab-plane) as illustrated in Figure S2(a). The Raman tensors corresponding to the phonon modes with symmetry is given by:

R(A1g) = ,

The angular dependence of the Raman intensity for these modes can be expressed as:

Without the loss of generality, may be taken as zero, resulting in the expression:

**(1)**

As shown in Figure S2(b), the intensities of the Raman modes exhibit a periodic variation with the rotation angle, indicating a strong vibration anisotropy in PtSe2/MoSe2 heterostructure. The Raman intensity gives a maximum value at 0˚/180˚ and a minimum value at 90˚/270˚ angle.
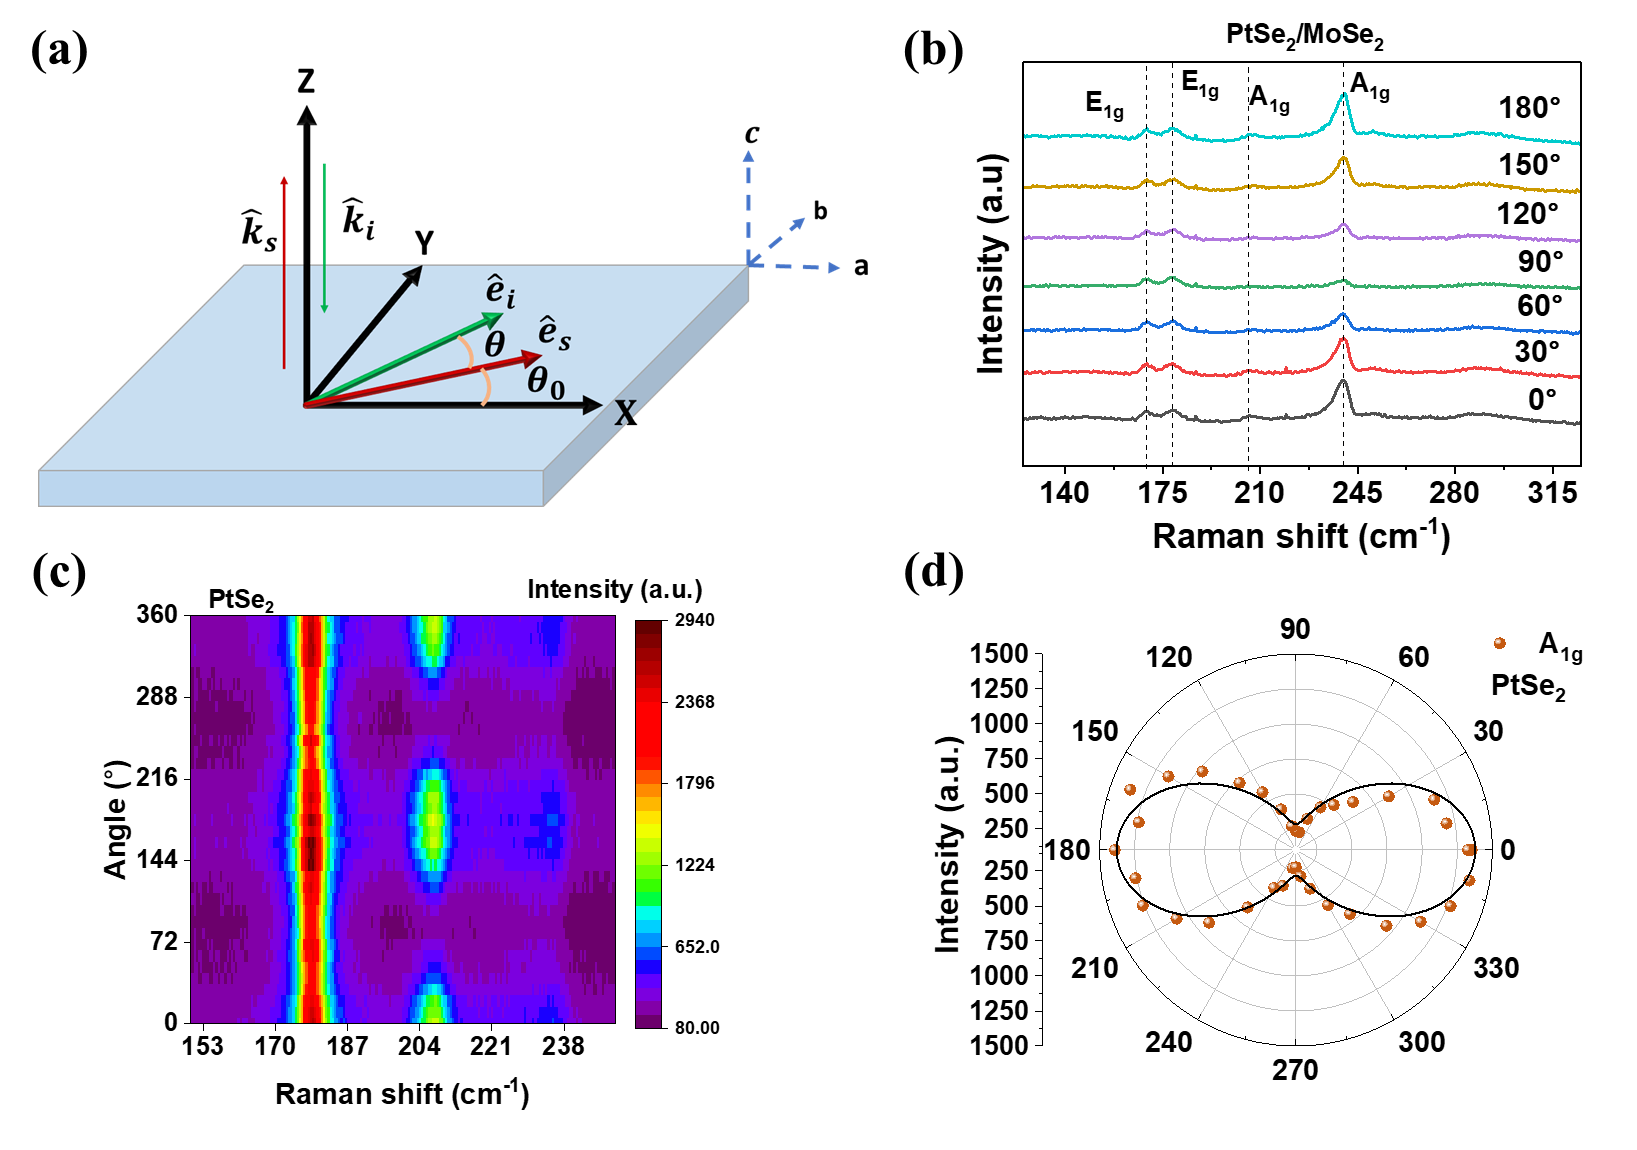
**Figure S2: (a)** Schematic representation of the in-plane projection of the polarization vectors of the incident () and scattered () light, oriented at angles and with respect to the X-axis, respectively. and represent the propagation directions of the incident and scattered beams**. (b)** Angle-resolved polarized Raman spectra of the PtSe2/MoSe2 heterostructure. **(c)** Polarization-dependent Raman intensity mapping of PtSe₂ as a function of polarization angle. **(d)** Polar plot showing the angular variation of the mode intensity at ~205 cm⁻¹.


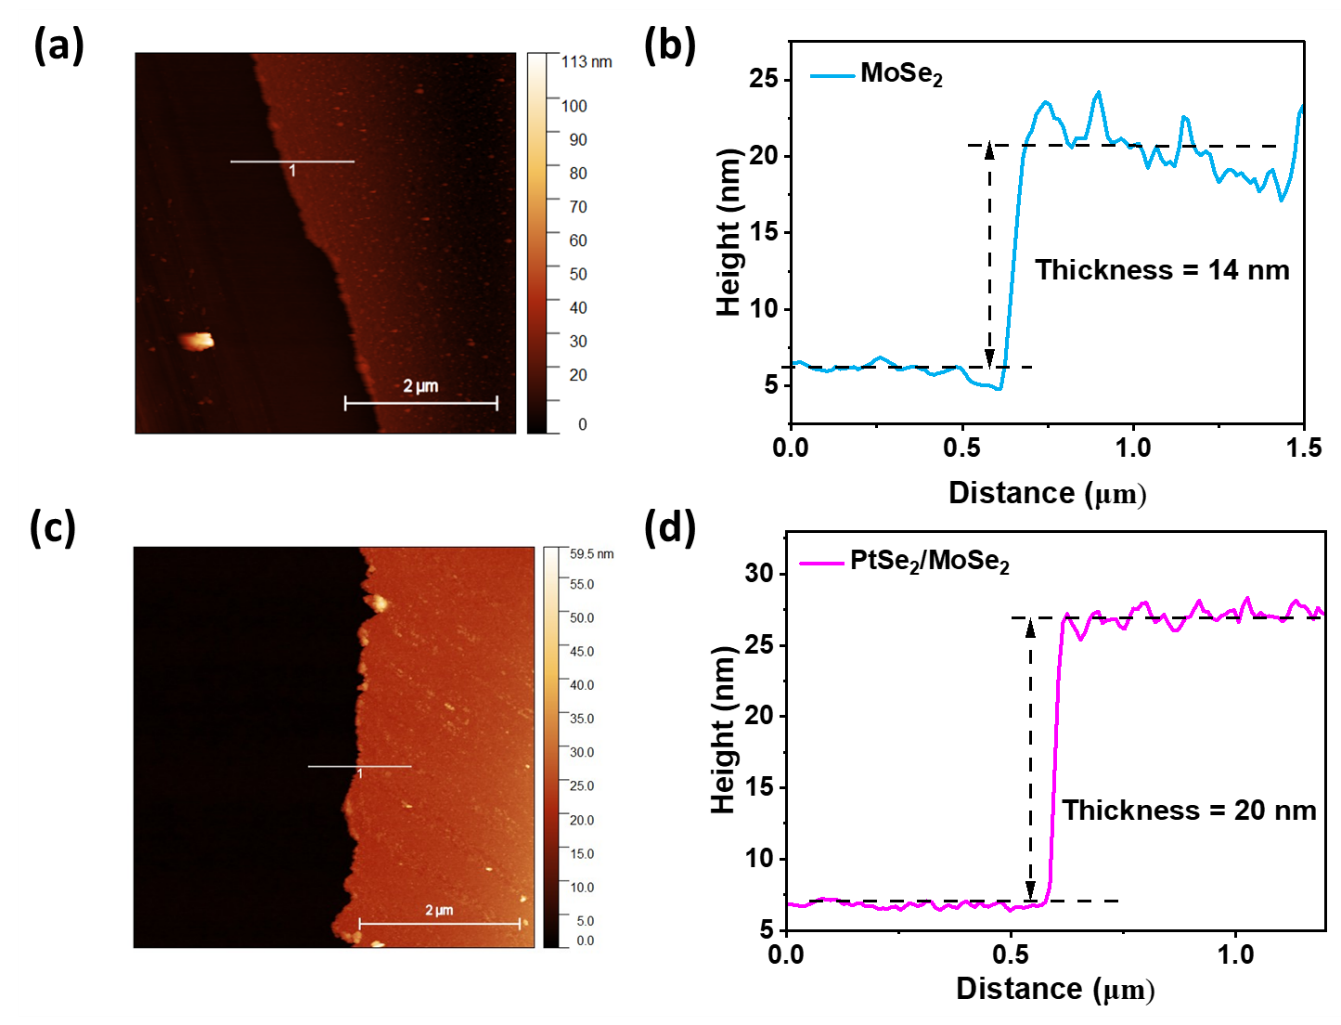


**Figure S3: (a)** AFM images show the step on the MoSe2 film on SiO2/Si substrate for the measured film thickness. **(b)** The height profile of the MoSe2 film. **(c)** AFM characterization of the PtSe2/MoSe2 heterostructure. **(d)** The height profile and corresponding thickness.


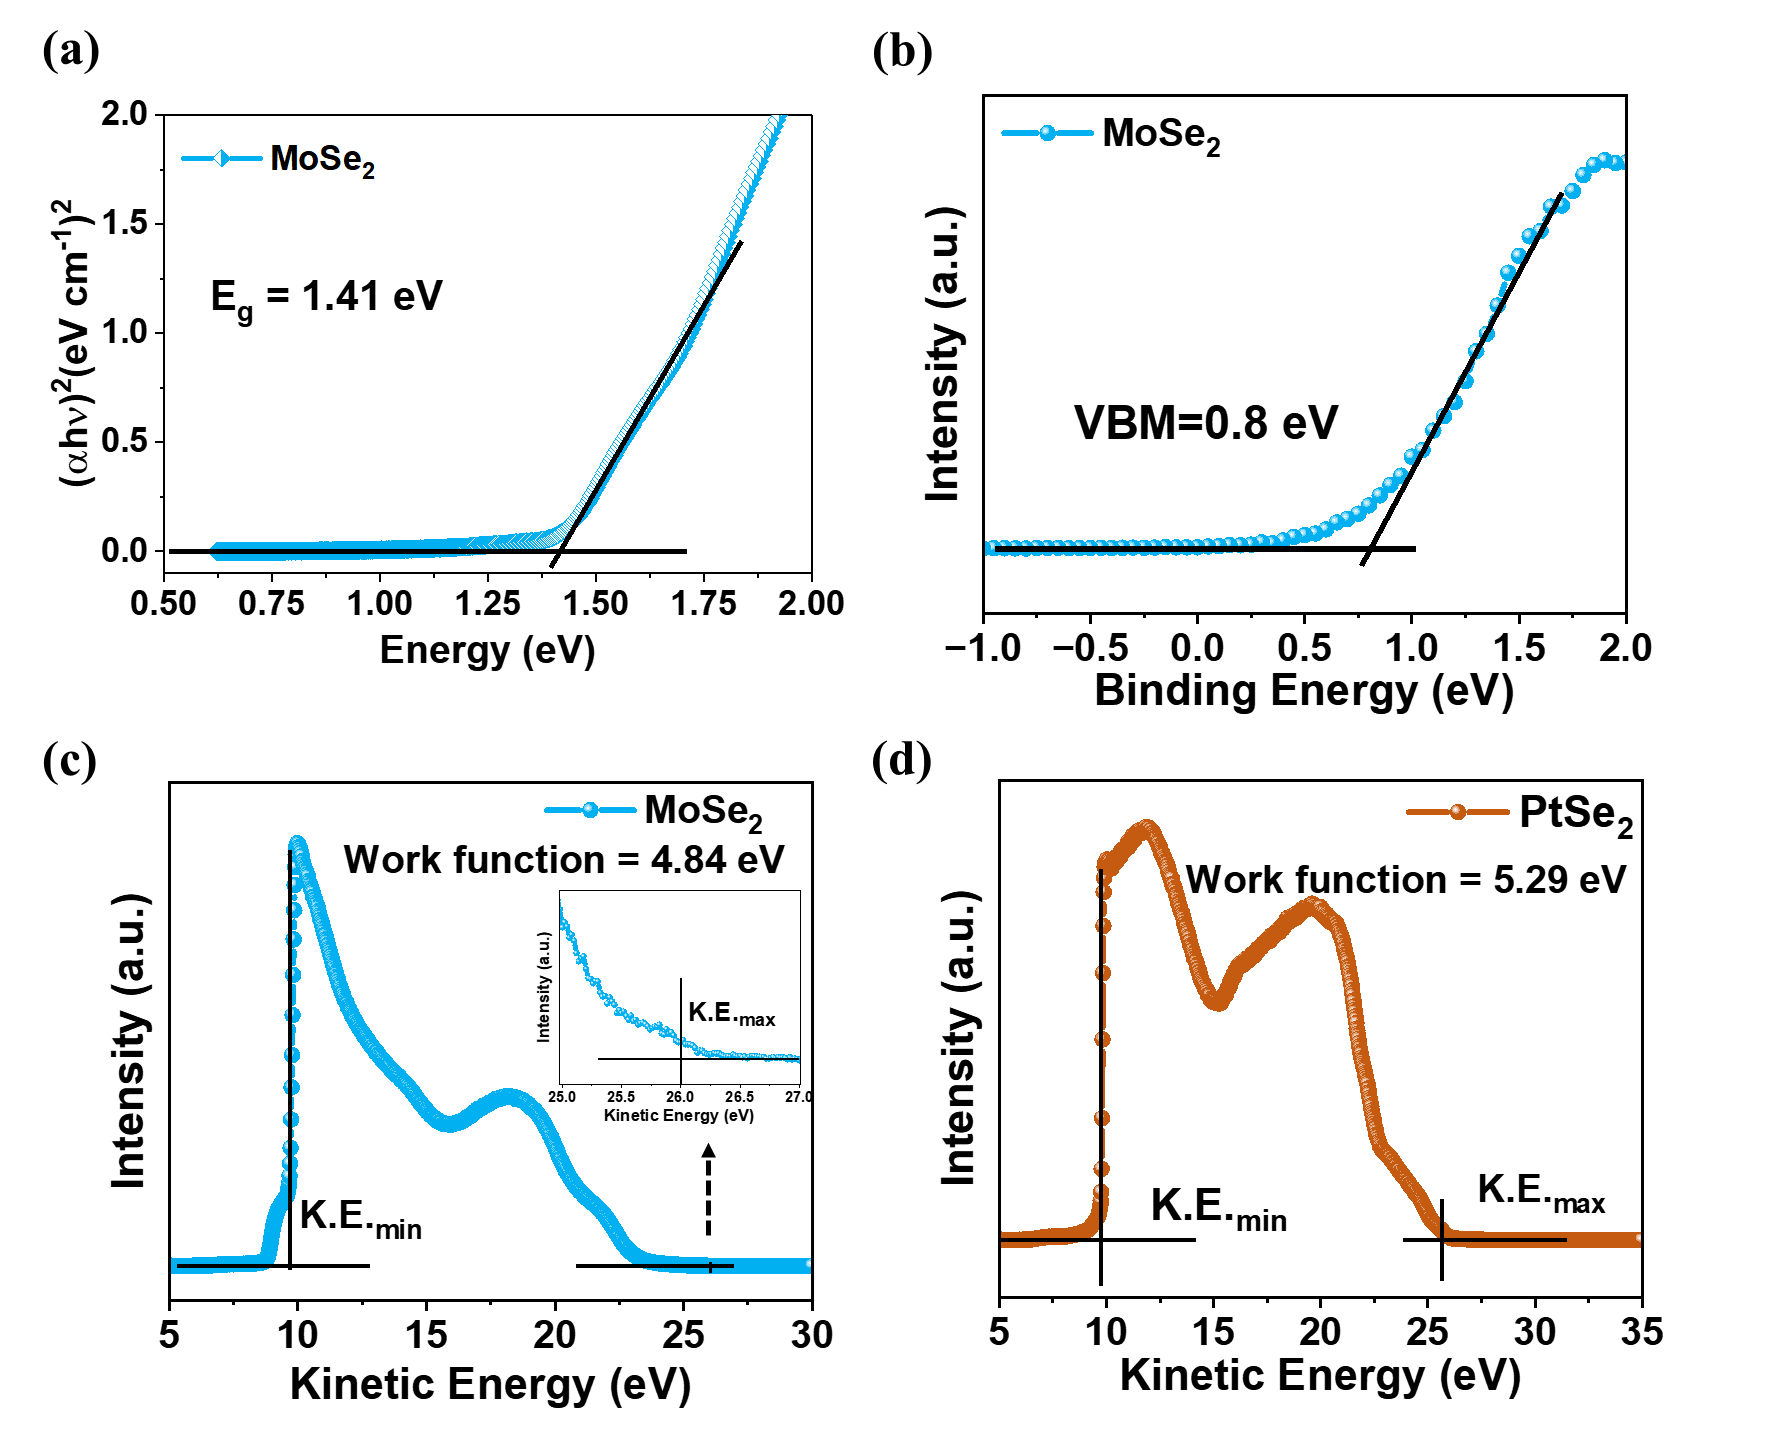


**Figure S4: (a)** Bandgap of MoSe2 obtained by TAUC plot. **(b)** VBM of MoSe2 from valence-band spectra data. **(c)** UPS spectrum of the MoSe2 thin film and **(d)** PtSe2 thin film, highlighting the secondary electron cutoff region for extracting the work function.


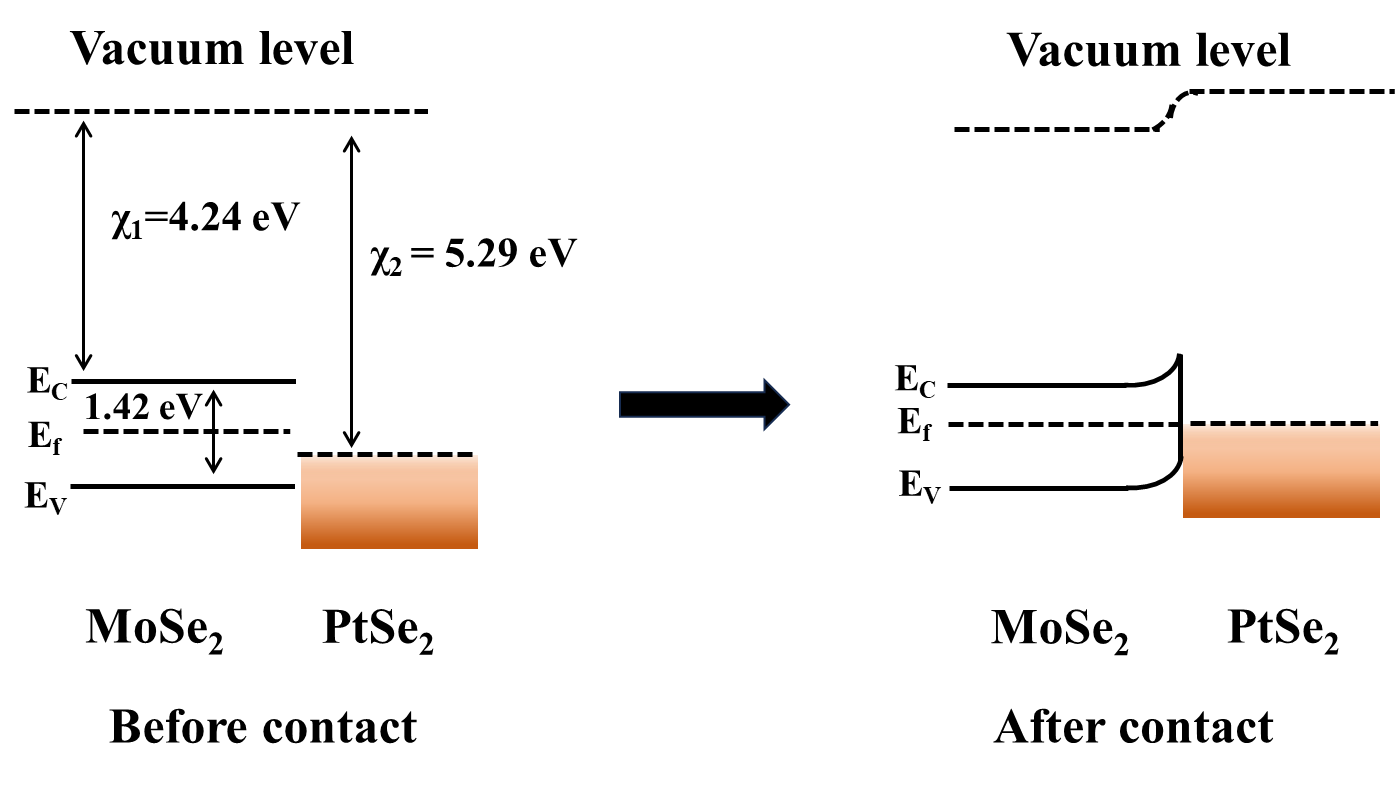


**Figure S5**: Energy band diagram of PtSe2/MoSe2 heterojunction **(a)** the band alignment of the individual PtSe2 and MoSe2 layers before forming the junction, and **(b)** the band structure after contact, illustrating Fermi level alignment and the formation of a built-in electric field at the interface.


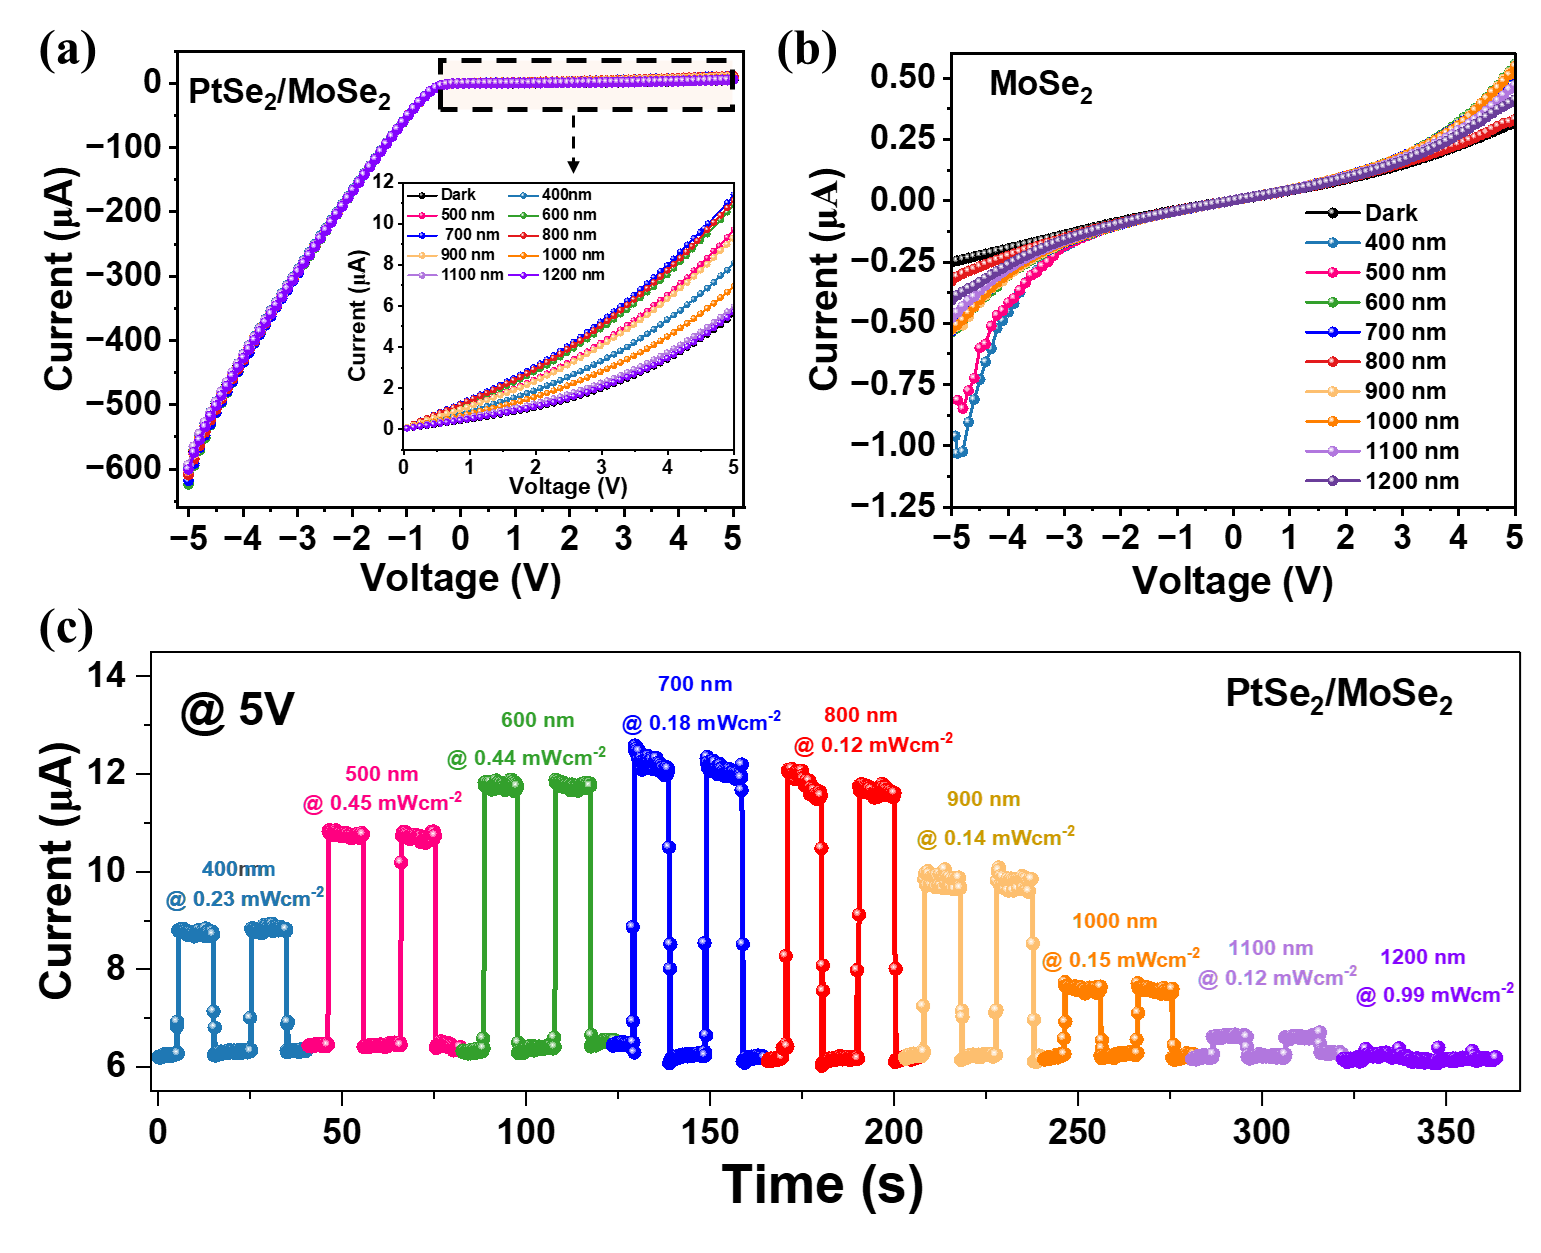


**Figure S6:** Device characteristics of PtSe2/MoSe2 and MoSe2. **(a)** I-V characteristics of the heterostructure measured under dark conditions and 400-1200 nm illumination are inserted to enlarge the view of the I-V form from 0 to 5V, highlighting the device performance. **(b)** The I-V characteristic of the bare MoSe2 device, showing broadband detection capability. **(c)** TheI-T characteristics of the PtSe2/MoSe2 heterostructure device confirm its broadband detection performance under the 5V bias.


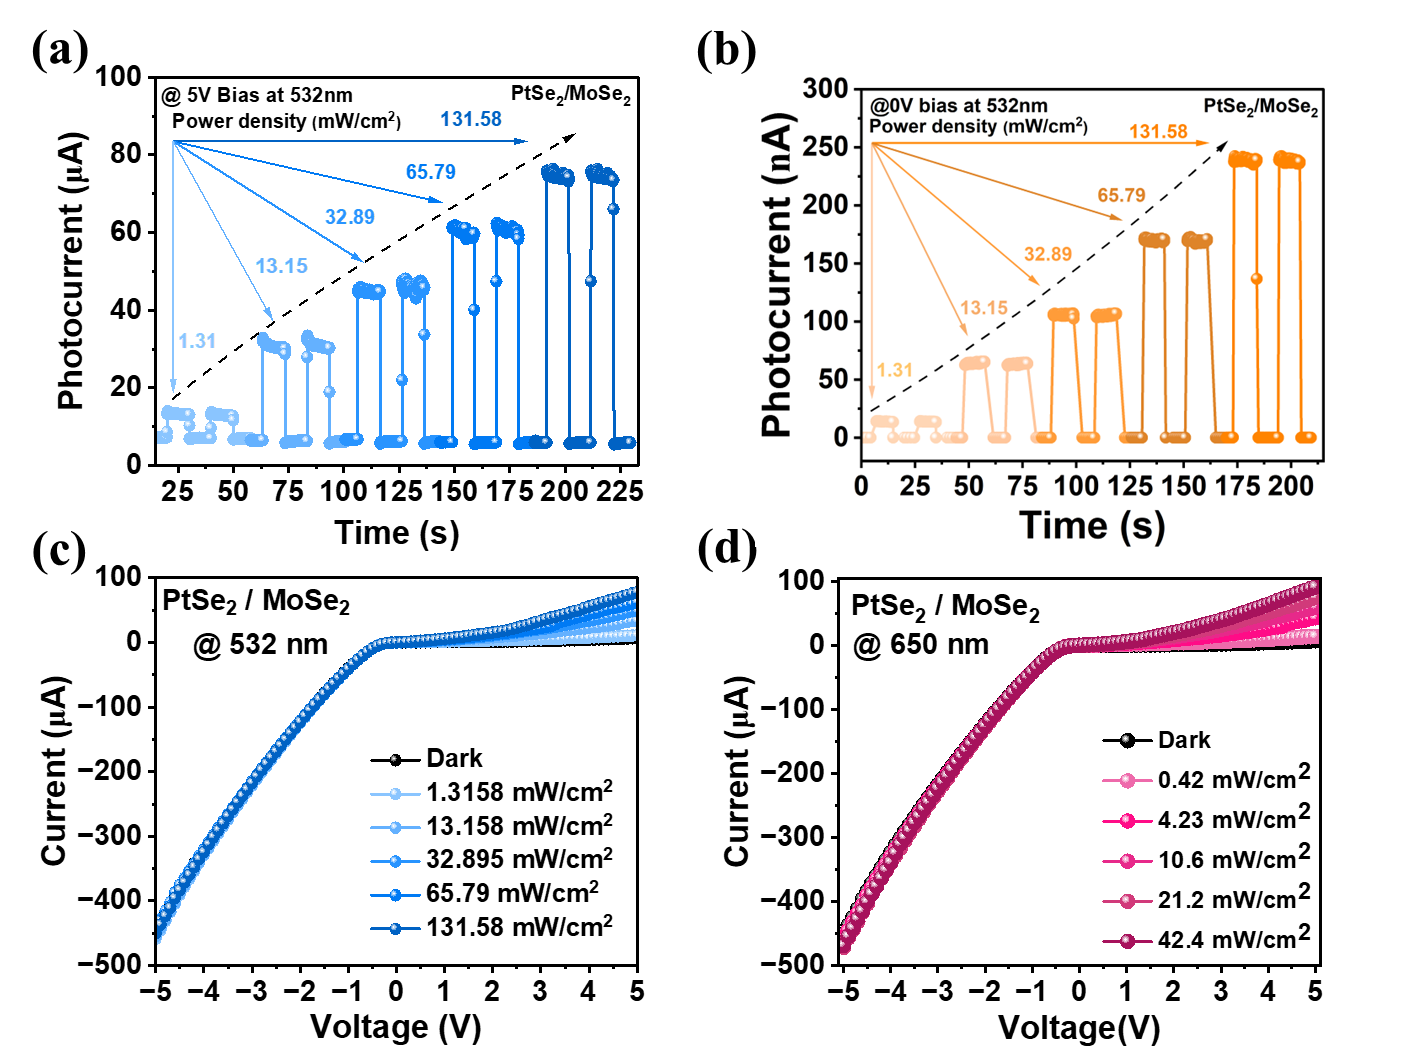


**Figure S7:** Power density dependent measurements of PtSe2/MoSe2 heterostructure device: Temporal response under 532 nm illumination at **(a)** 5V bias and **(b)** at 0Vbias**.** Current-voltage characteristics measurement at different light intensities for **(c)** 532 nm and **(d)** 650 nm excitation**.**


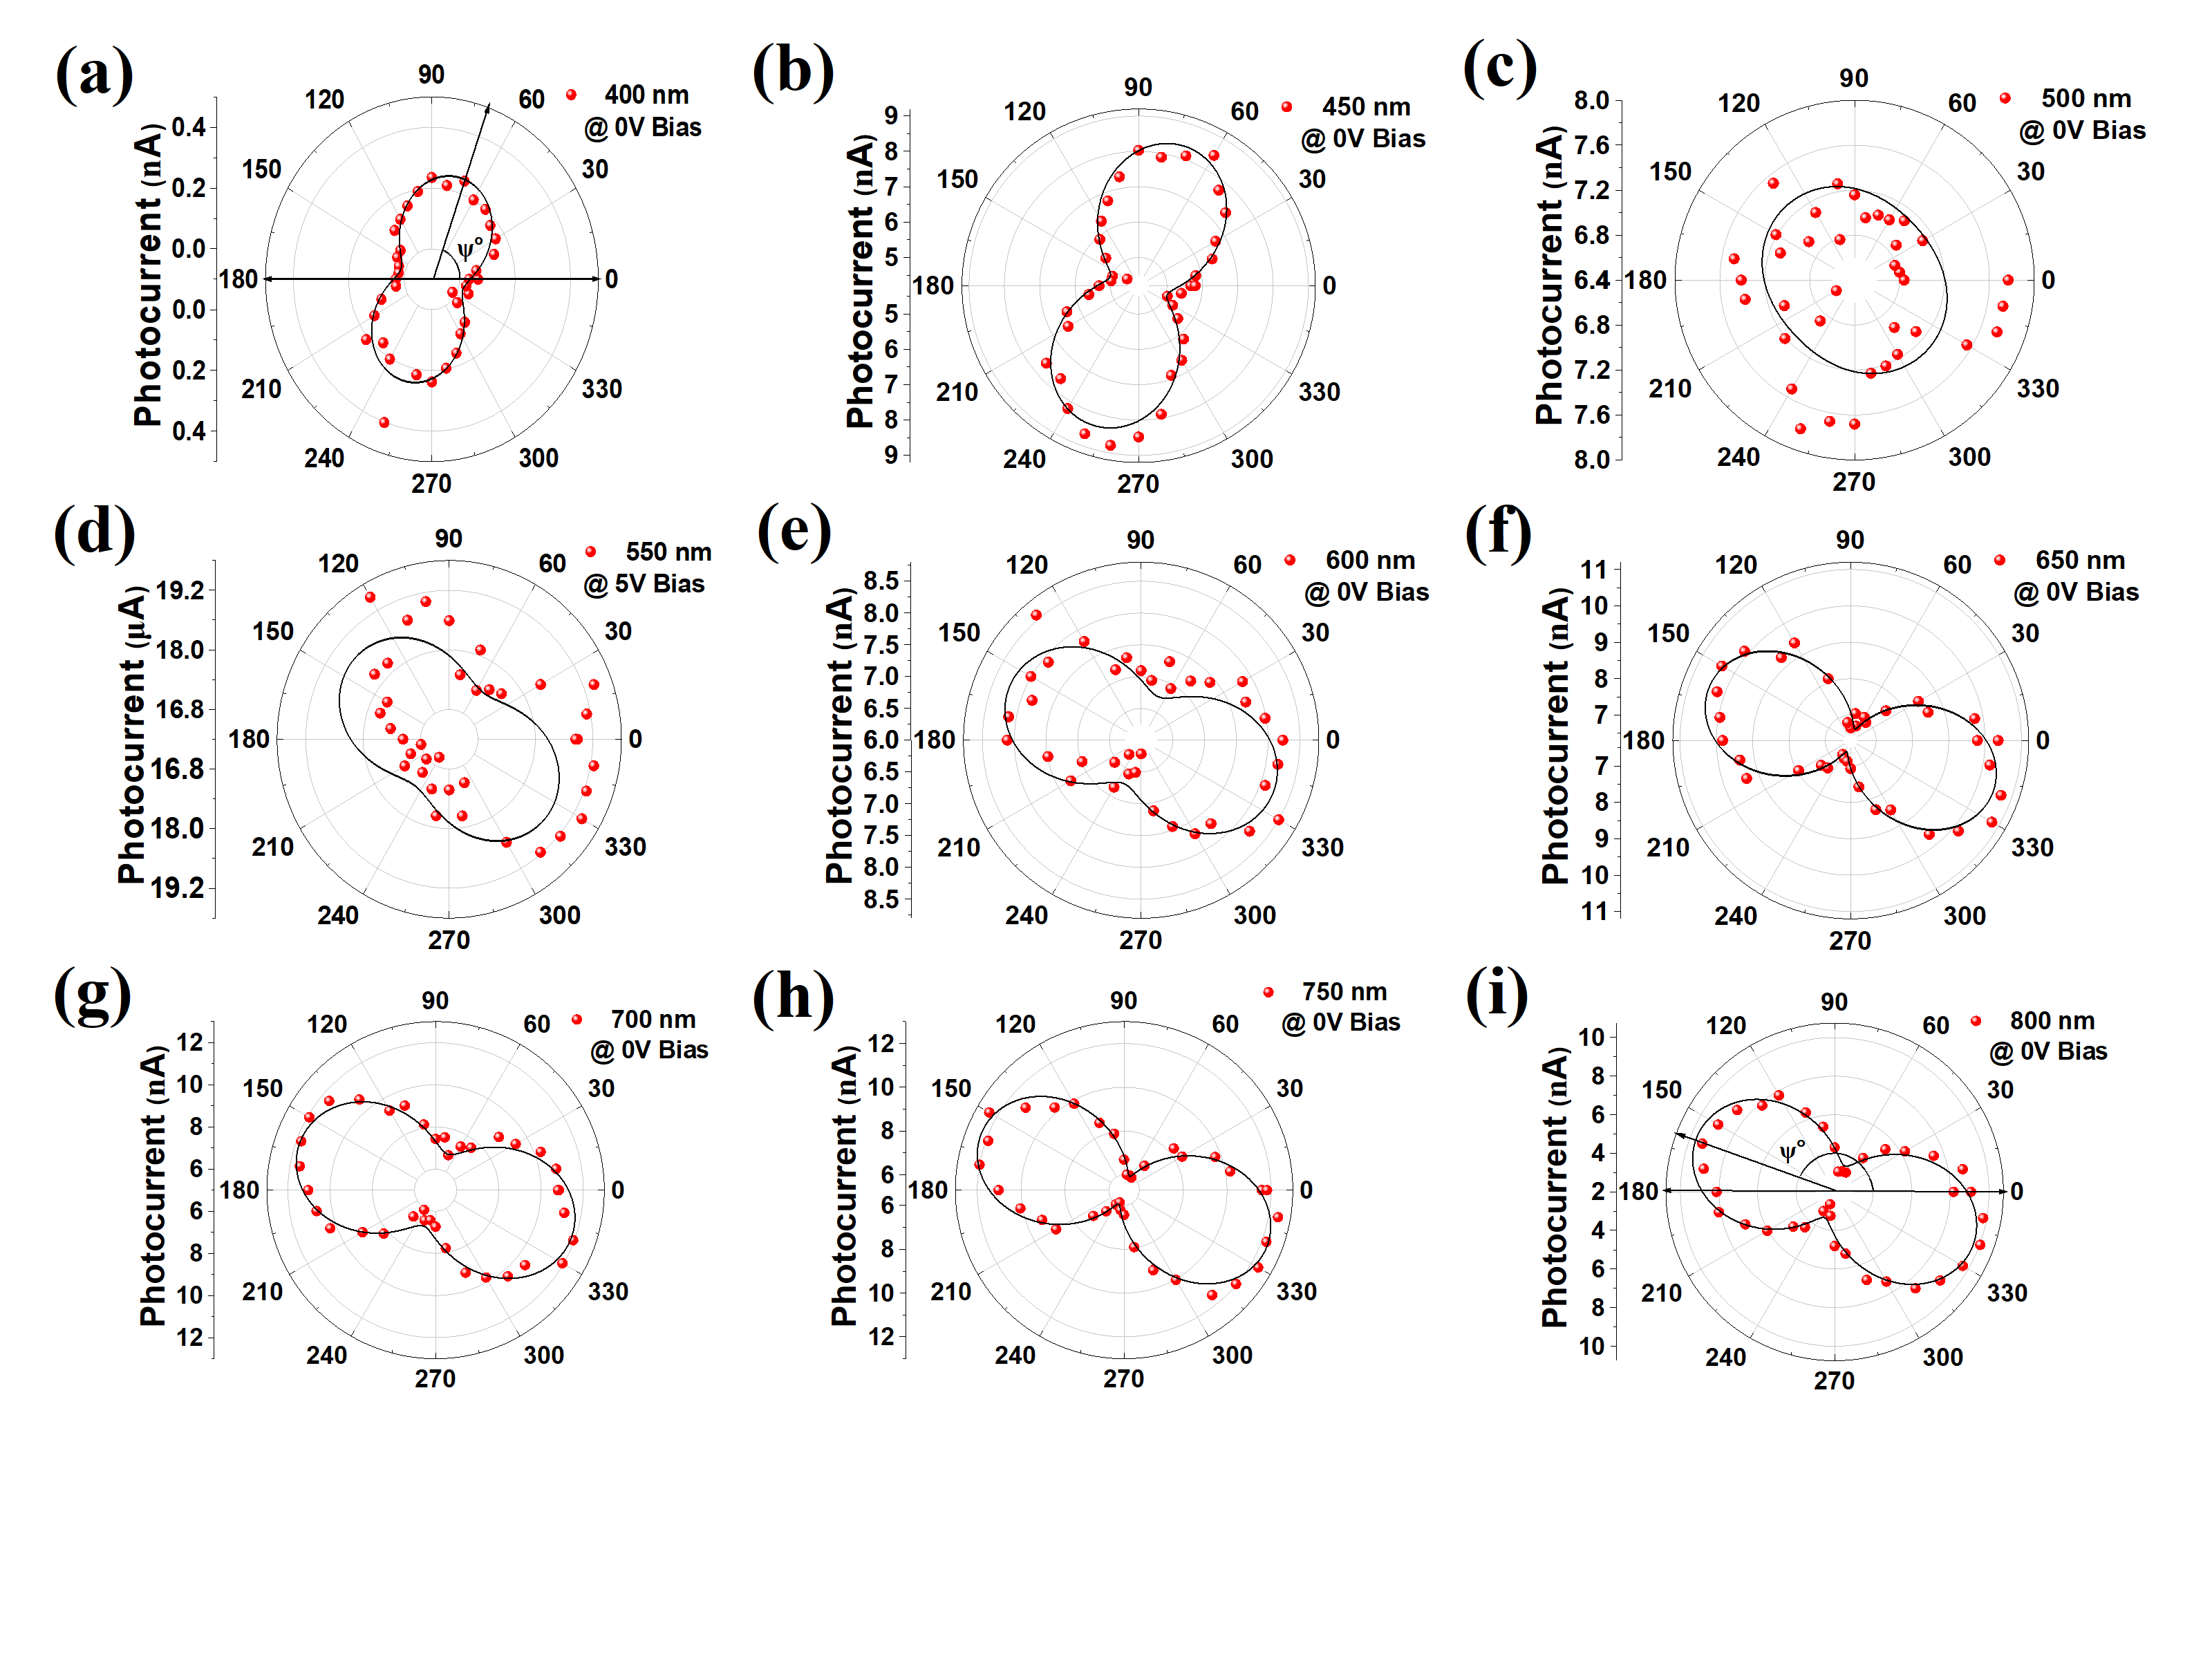


**Figure S8: (a-i)** Wavelength-dependent polarization response of the PtSe2/MoSe2 heterostructure device under illumination from 400 nm to 800 nm in self-bias condition.


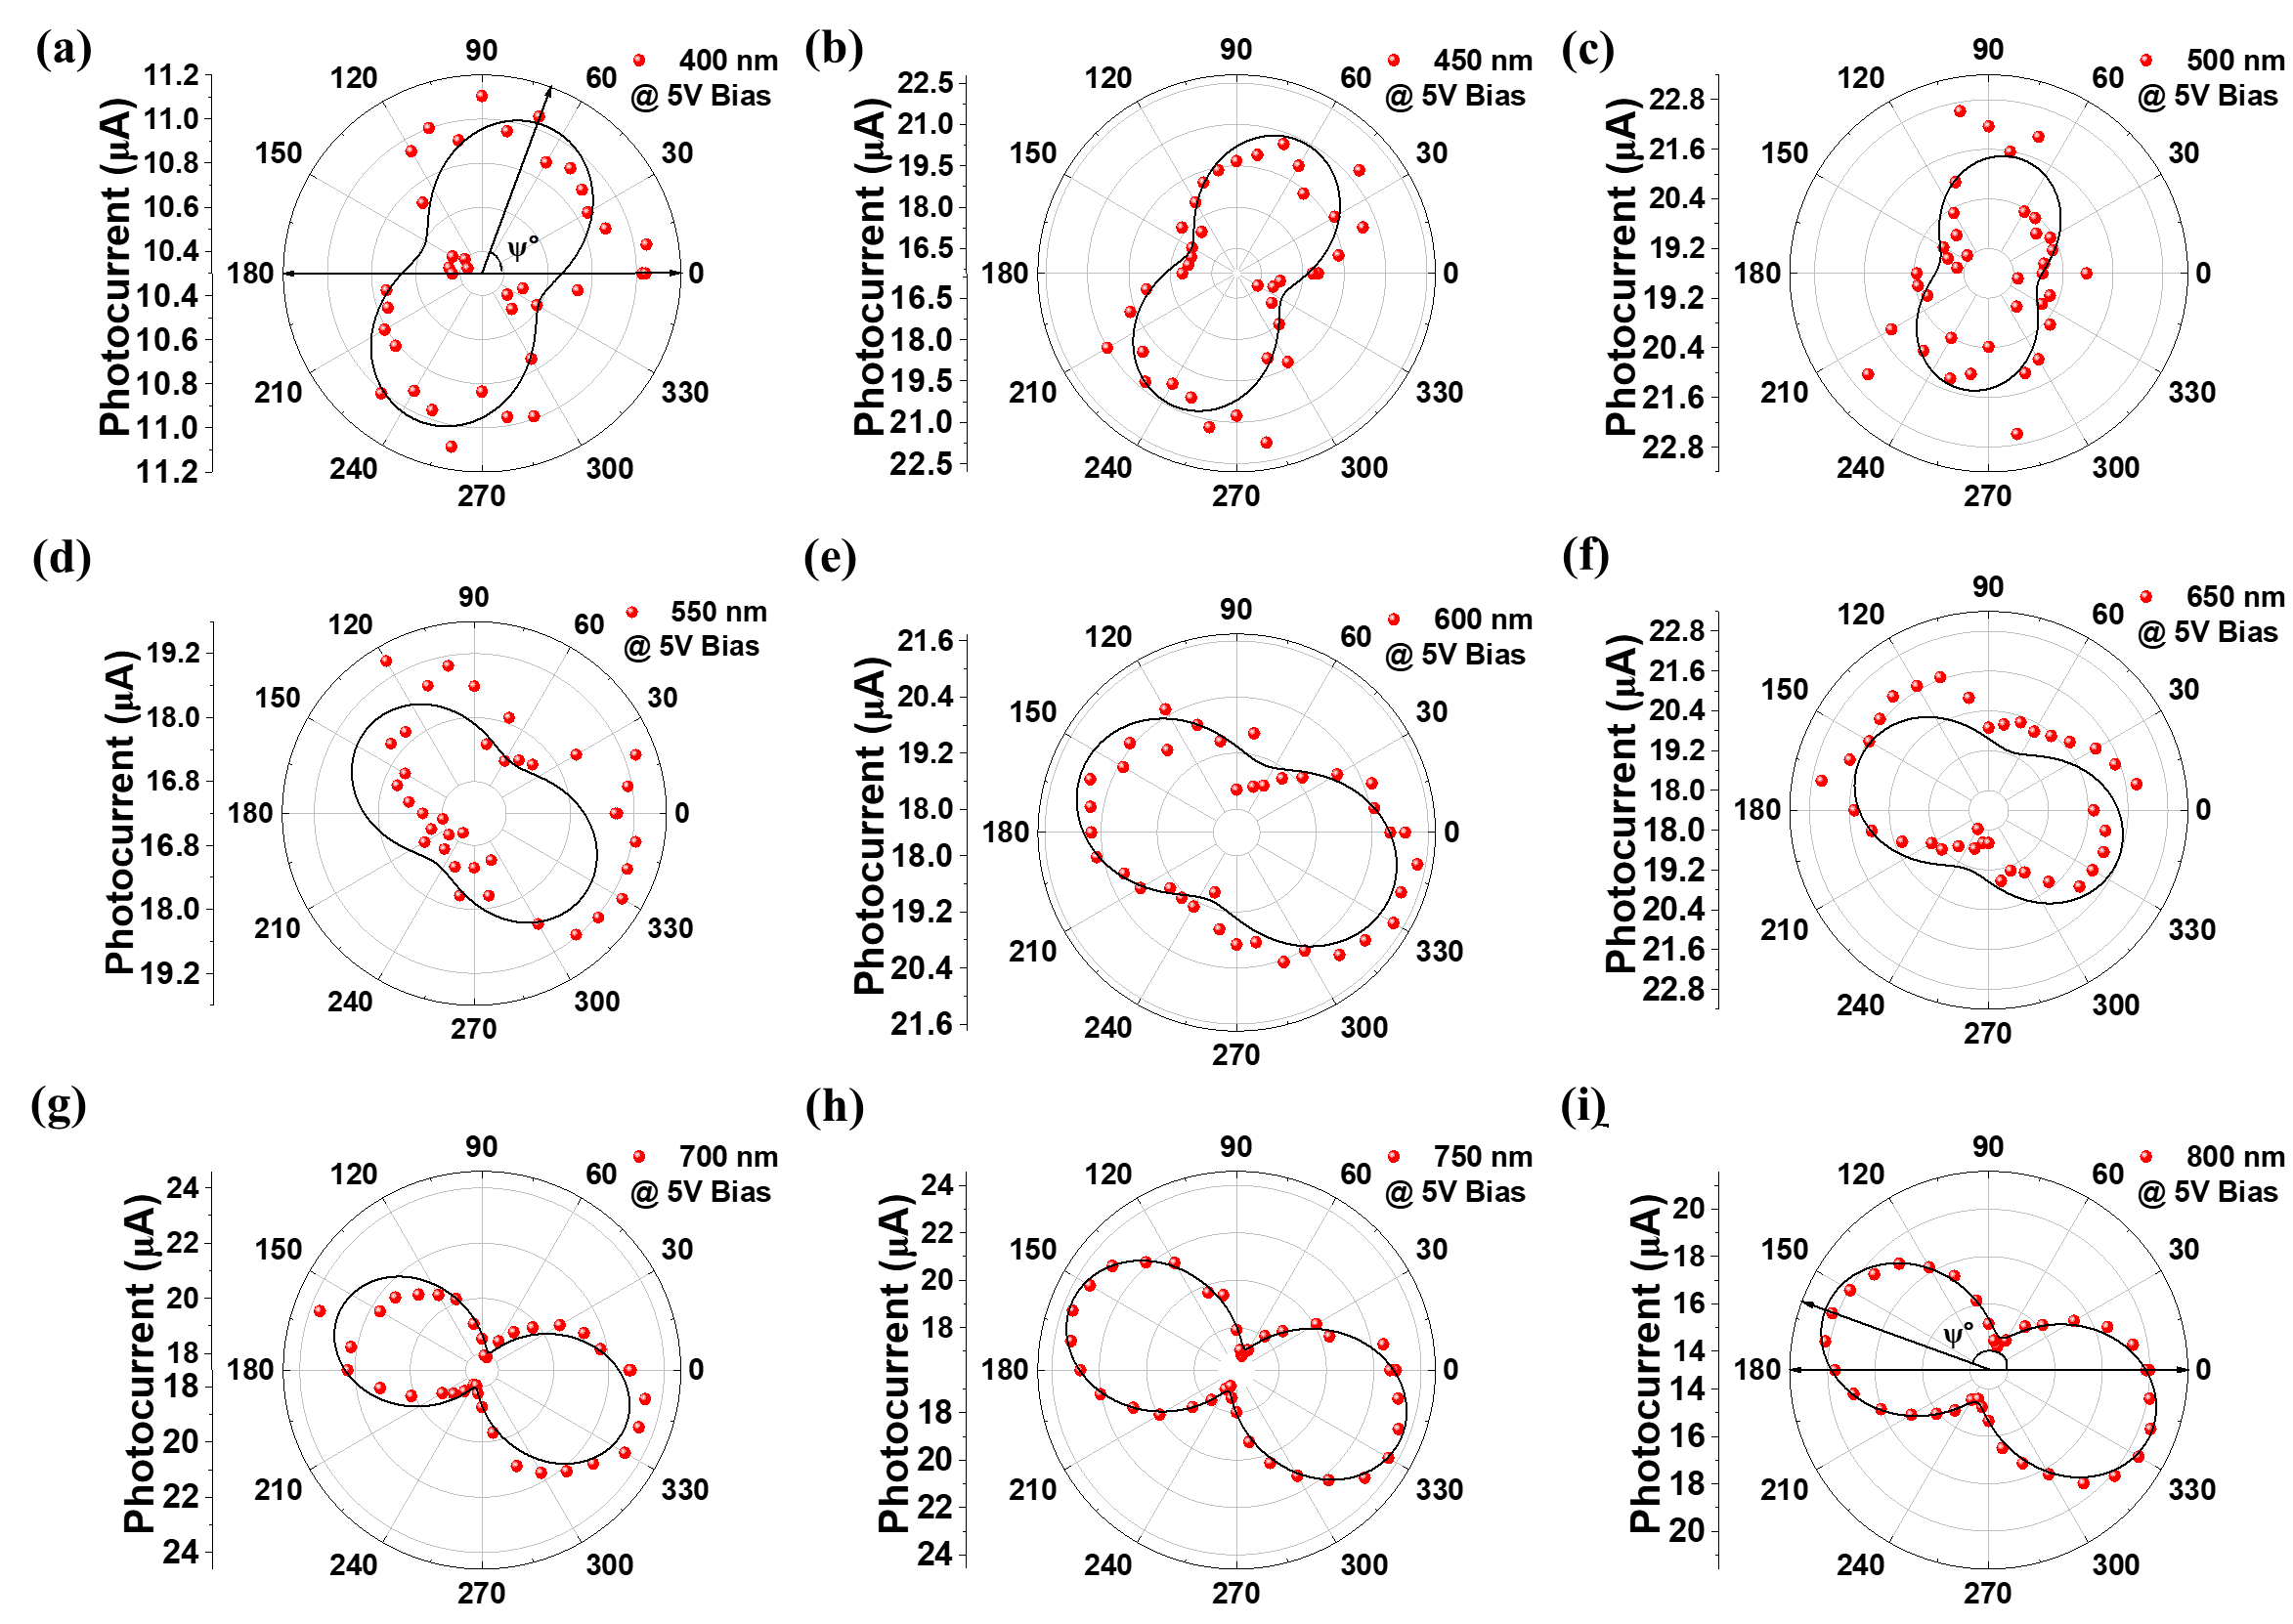


**Figure S9: (a-i)** Wavelength-dependent polarization response of the PtSe2/MoSe2 heterostructure device under illumination from 400 nm to 800 nm at a bias of 5V.


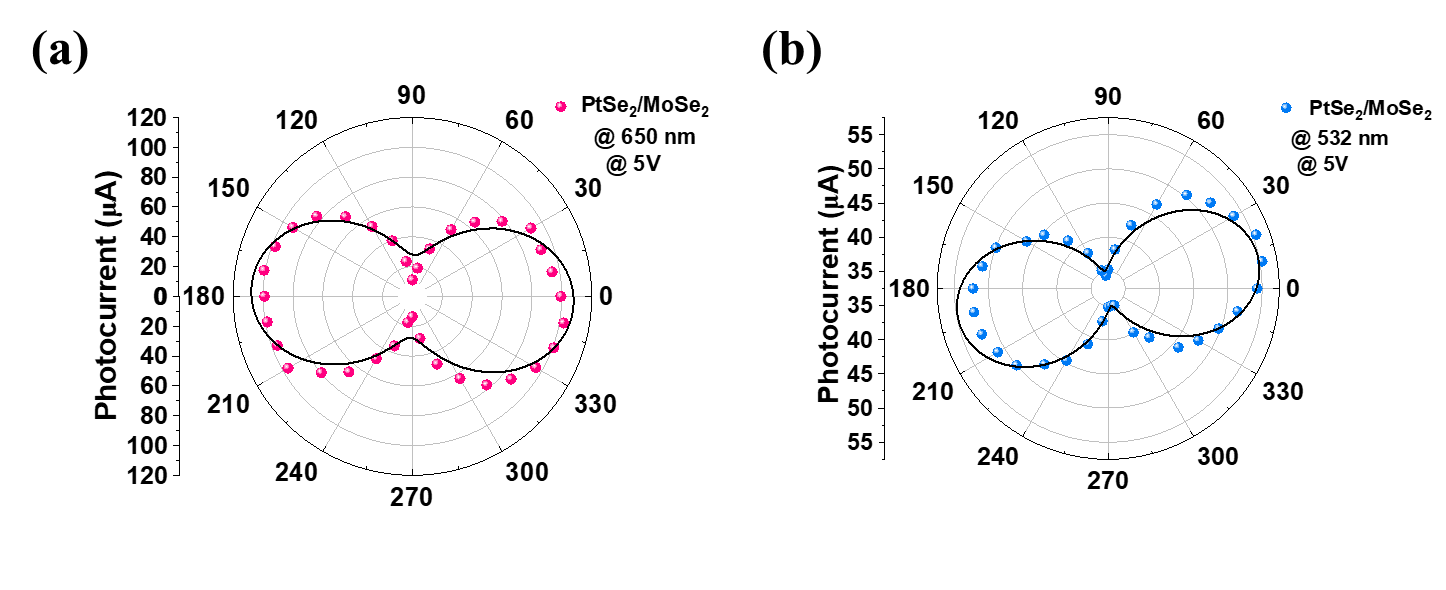


**Figure S10: (a)** Polar plot of polarized photocurrents under 650 nm illumination at 5V bias. Photocurrent versus polarization angle under 532 nm illumination **(b)** at 0V bias and **(c)** 5V bias.


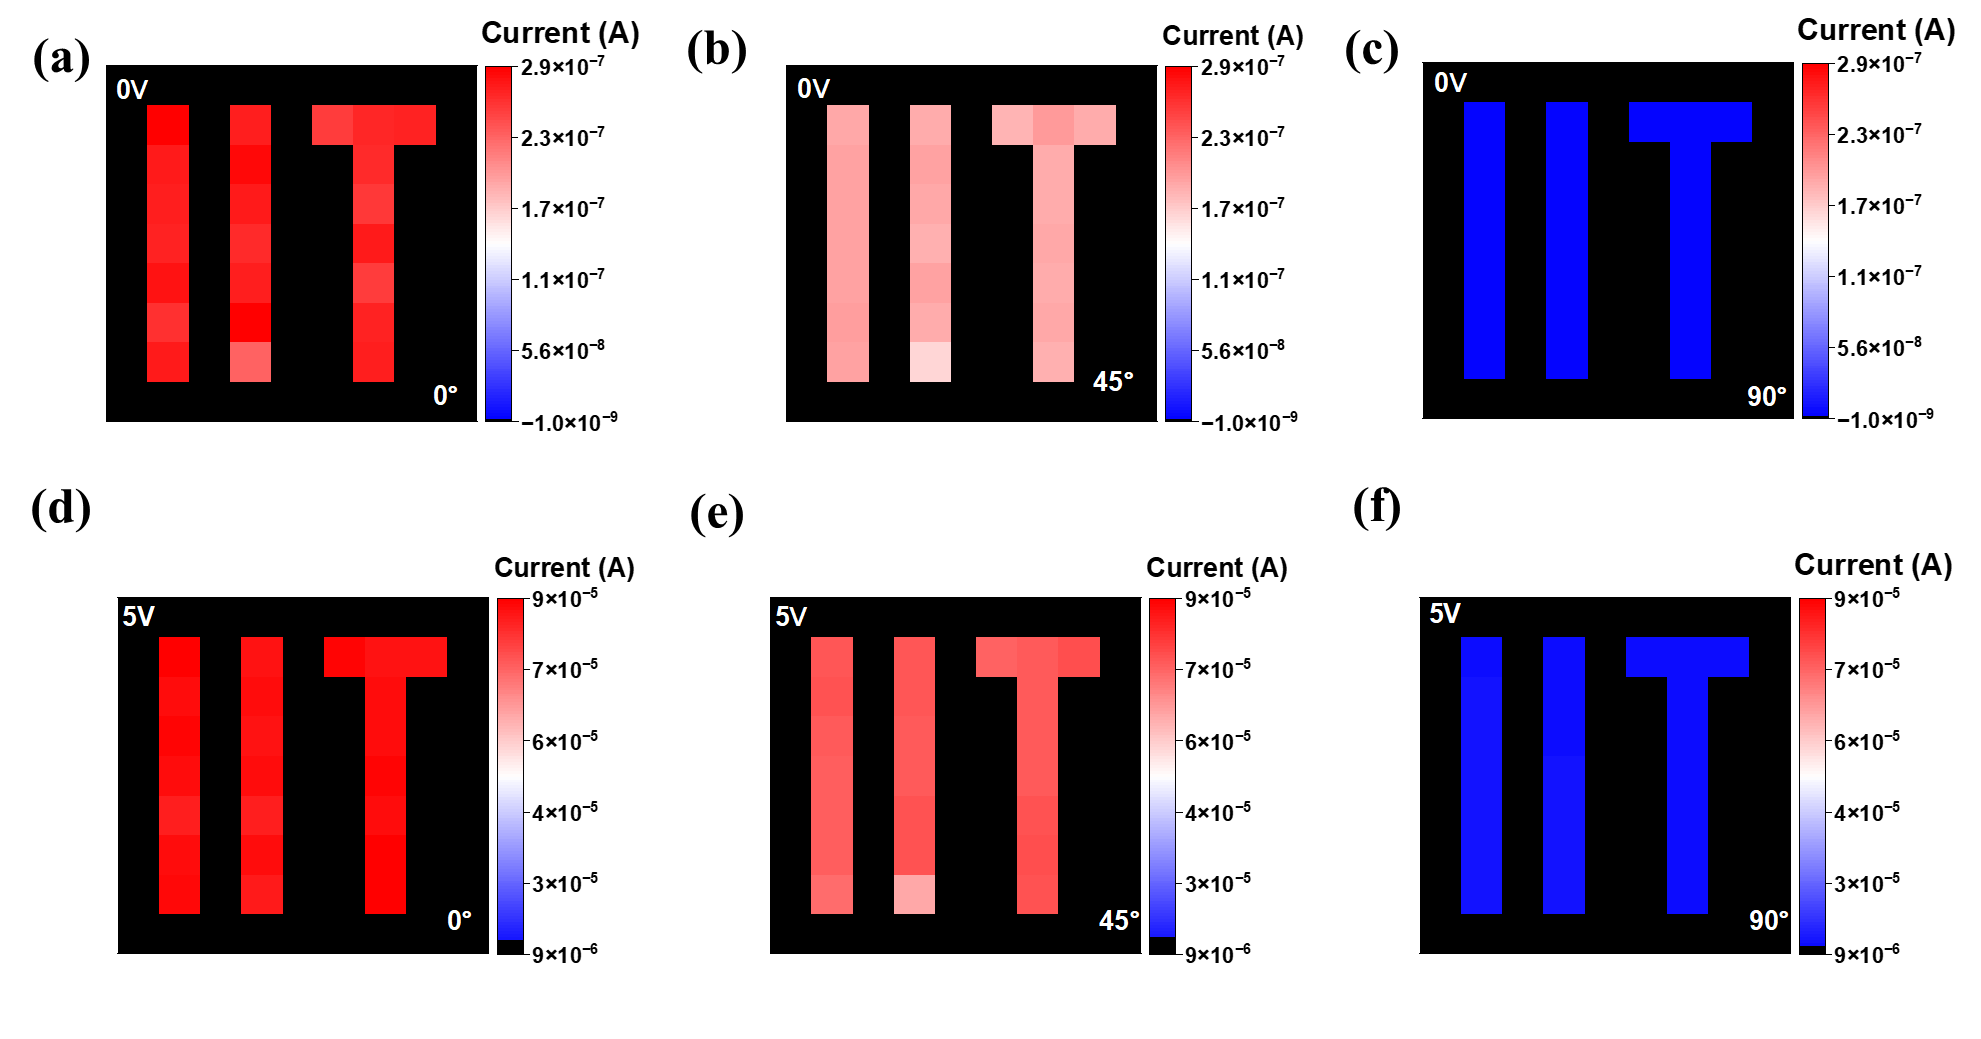


**Figure S11:** Polarization-dependent photocurrent mapping images at 0˚ , 45˚ , and 90˚ polarization angles: **(a–c)** under self-biased conditions, **(d–f)** at 5 V bias.

**Table S1:** **The incident optical power density of 400 nm -1200 nm wavelength range.**

| **Wavelength (nm)** | 400 | 500 | 600 | 700 | 800 | 900 | 1000 | 1100 | 1200 |
| --- | --- | --- | --- | --- | --- | --- | --- | --- | --- |
| **Optical Power density (mW/cm-2)** | 0.23 | 0.45 | 0.44 | 0.18 | 0.12 | 0.14 | 0.15 | 0.12 | 0.99 |

**Table S2: Comparison of the polarization ratio of the PtSe2/MoSe2 heterostructure device with other self-powered polarization sensitive based photodetector.**

| **Device** | **Wave-length (nm)** | **Detectivity (Jones)** | **Responsivity** | **Response time** | **Polarization Ratio** | **Reference** |
| --- | --- | --- | --- | --- | --- | --- |
| **PtSe2/MoSe2** | **400-1200** | **1.6×1010** | **0.74 mA/W** | **68 µs** | **38** | **This Work** |
| MoSe2/PdSe2 | 785 | 0.6 × 1011 | 10.1 A/W | 256/278 µs | 1.97 | **2** |
| GeSe/MoS2 | 532 | 1.46 × 1010 | 105 mA/W | 110/750ms | 0.35 | **3** |
| MoTe2/MoSe2 | 405 | 1.15 × 1011 | 130.89 mA/W | 362/480 µs | 15.48 | **4** |
| T-MoSe2/GeSe/B-MoSe2 | 635 | 6.6 × 1010 | 206 mA W-1 | 5.19/1.32 ms | 12.5 | **5** |
| MoSe2/GeSe vdWH | 635 | 6.8 × 109 | 43 mA W-1 | 6.62/3.32 ms, | ≈3.5 | **5** |
| 1T'-MoTe2/WS2 | 635 | 1.2 × 1012 | 2.04 A/W | 45 µs | 5 | **6** |
| WSe2/ReSe2 | 520 | 107-109 | 0.48 A/W | 2 µs | 1.67 | **7** |
| PdSe2/GaN | 405 | 7.9 × 1012 | 249.9 mA/W | 28.5/122.6 µs | 4.5 | **8** |
| GeAs/InSe | 635 | 2 × 1011 | 357 mA/W | 25ms | 18 | **9** |
| MoS2/GaAs | 780 | 1.96 × 1013 | 35.2 mA W−1 | 3.4/15.6 µs | 4.8 | **10** |
| SnS/InSe | 635 | 1.05 × 1010 | 215 mA W−1 | 8.6/4.2 ms | 4.6 | **11** |
| p-Te/n-MoSe2 | 405 | 2.91 × 1013 | 2106 mA W−1 | 25/22ms | 16.39 | **12** |
| MoTe2/MoS2 | 405 | 1.2 × 1010 | 79 mA/W | 180/202 µs | 1.10 | **13** |
| PdSe2/2H–MoTe2 | 532 | 6.46 × 1010 | 0.243A/W | 3.5/3.7 ms | 2 | **14** |
| Te/PdSe2 | 1550 | 5.27 × 1010 | 0.617 A/W | 4.5 μs | 3.56 | **15** |
| PdSe2/Perovskite | 808 | 1013 | 0.313 A/W | 3.5/4 μs | 6.04 | **16** |
| GeAs/WS2 | 1310 | 1.08 × 1012 | 0.51 A/W | 1.3 ms | 4.5 | **17** |
| ReS2/WS2 | 532 | - | 1.85 mA/W | 1.3 ms | 1.85 | **18** |

**References**

1. Auti CB*, et al.* Antipolar and short- and long-range magnetic ordering in quasi-two-dimensional AgCrP2S6. *Journal of Materials Chemistry C*, (2026).

2. Liu M*, et al.* Uncooled near- to long-wave-infrared polarization-sensitive photodetectors based on MoSe2/PdSe2 van der Waals heterostructures. *Nature Communications* **16**, 2774 (2025).

3. Xin Y*, et al.* Polarization-Sensitive Self-Powered Type-II GeSe/MoS2 van der Waals Heterojunction Photodetector. *ACS Applied Materials & Interfaces* **12**, 15406-15413 (2020).

4. Gao P*, et al.* MoTe2/MoSe2 vdW Schottky Photodetector for Polarized Photodetection. *Chip*, 100147 (2025).

5. An K*, et al.* High-Performance Self-Driven Polarization-Sensitive Imaging Photodetectors based on Fully Depleted T-MoSe2/GeSe/B-MoSe2 Van der Waals Dual-Heterojunction. *Advanced Functional Materials* **34**, 2409331 (2024).

6. Wu J*, et al.* Engineering the Polarization Sensitivity in All-2D Photodetectors Composed of Semimetal MoTe2 and Semiconductor WS2. *Advanced Optical Materials* **10**, 2201902 (2022).

7. Ahn J*, et al.* Near-Infrared Self-Powered Linearly Polarized Photodetection and Digital Incoherent Holography Using WSe2/ReSe2 van der Waals Heterostructure. *ACS Nano* **15**, 17917-17925 (2021).

8. Wu D*, et al.* In Situ Fabrication of PdSe2/GaN Schottky Junction for Polarization-Sensitive Ultraviolet Photodetection with High Dichroic Ratio. *ACS Nano* **16**, 5545-5555 (2022).

9. Xiong J*, et al.* High Performance Self-Driven Polarization-Sensitive Photodetectors Based on GeAs/InSe Heterojunction. *Advanced Optical Materials* **9**, 2101017 (2021).

10. Jia C*, et al.* A self-powered high-performance photodetector based on a MoS2/GaAs heterojunction with high polarization sensitivity. *Journal of Materials Chemistry C* **7**, 3817-3821 (2019).

11. Gao P*, et al.* Low-pressure PVD growth SnS/InSe vertical heterojunctions with type-II band alignment for typical nanoelectronics. *Nanoscale* **14**, 14603-14612 (2022).

12. Zhao Q*, et al.* High performance polarization-sensitive self-powered imaging photodetectors based on a p-Te/n-MoSe2 van der Waals heterojunction with strong interlayer transition. *Materials Horizons* **8**, 3113-3123 (2021).

13. Kong L*, et al.* Polarization-Sensitive, Self-Powered, and Broadband Semimetal MoTe2/MoS2 van der Waals Heterojunction for Photodetection and Imaging. *ACS Applied Materials & Interfaces* **15**, 43135-43144 (2023).

14. Che M*, et al.* PdSe2/2H–MoTe2 Heterojunction Self-Powered Photodetector: Broadband Photodetection and Linear/Circular Polarization Capability. *ACS Nano* **18**, 30884-30895 (2024).

15. Wang P*, et al.* Anisotropic Te/PdSe2 Van Der Waals Heterojunction for Self-Powered Broadband and Polarization-Sensitive Photodetection. *Small* **20**, 2401216 (2024).

16. Zeng L-H*, et al.* Multilayered PdSe2/Perovskite Schottky Junction for Fast, Self-Powered, Polarization-Sensitive, Broadband Photodetectors, and Image Sensor Application. *Advanced Science* **6**, 1901134 (2019).

17. Xiong J*, et al.* Multifunctional GeAs/WS2 Heterojunctions for Highly Polarization-Sensitive Photodetectors in the Short-Wave Infrared Range. *ACS Applied Materials & Interfaces* **14**, 22607-22614 (2022).

18. Tang Y*, et al.* Distinctive Interfacial Charge Behavior and Versatile Photoresponse Performance in Isotropic/Anisotropic WS 2 /ReS 2 Heterojunctions. *ACS Applied Materials & Interfaces* **12**, 53475-53483 (2020).
